# Supplementary material for: Behavioral Monitoring of Sexual Offenders Against Children in Virtual Risk Situations: A Feasibility Study
Source: PubMed Central journal article supplement (PMC5845629; doi:10.3389/fpsyg.2018.00224), 2018-03-06
Supplement: DataSheet2.pdf [file DataSheet2.pdf]

***Supplementary Material:***  
**Behavioral monitoring of sexual offenders  
against children in virtual risk situations: a  
feasibility study.**

**Peter Fromberger<sup>\*</sup>, Sabrina Meyer, Kirsten Jordan and Jürgen L. Müller**

**\*Correspondence:**

Peter Fromberger

[peter.fromberger@medizin.uni-goettingen.de](mailto:peter.fromberger@medizin.uni-goettingen.de)

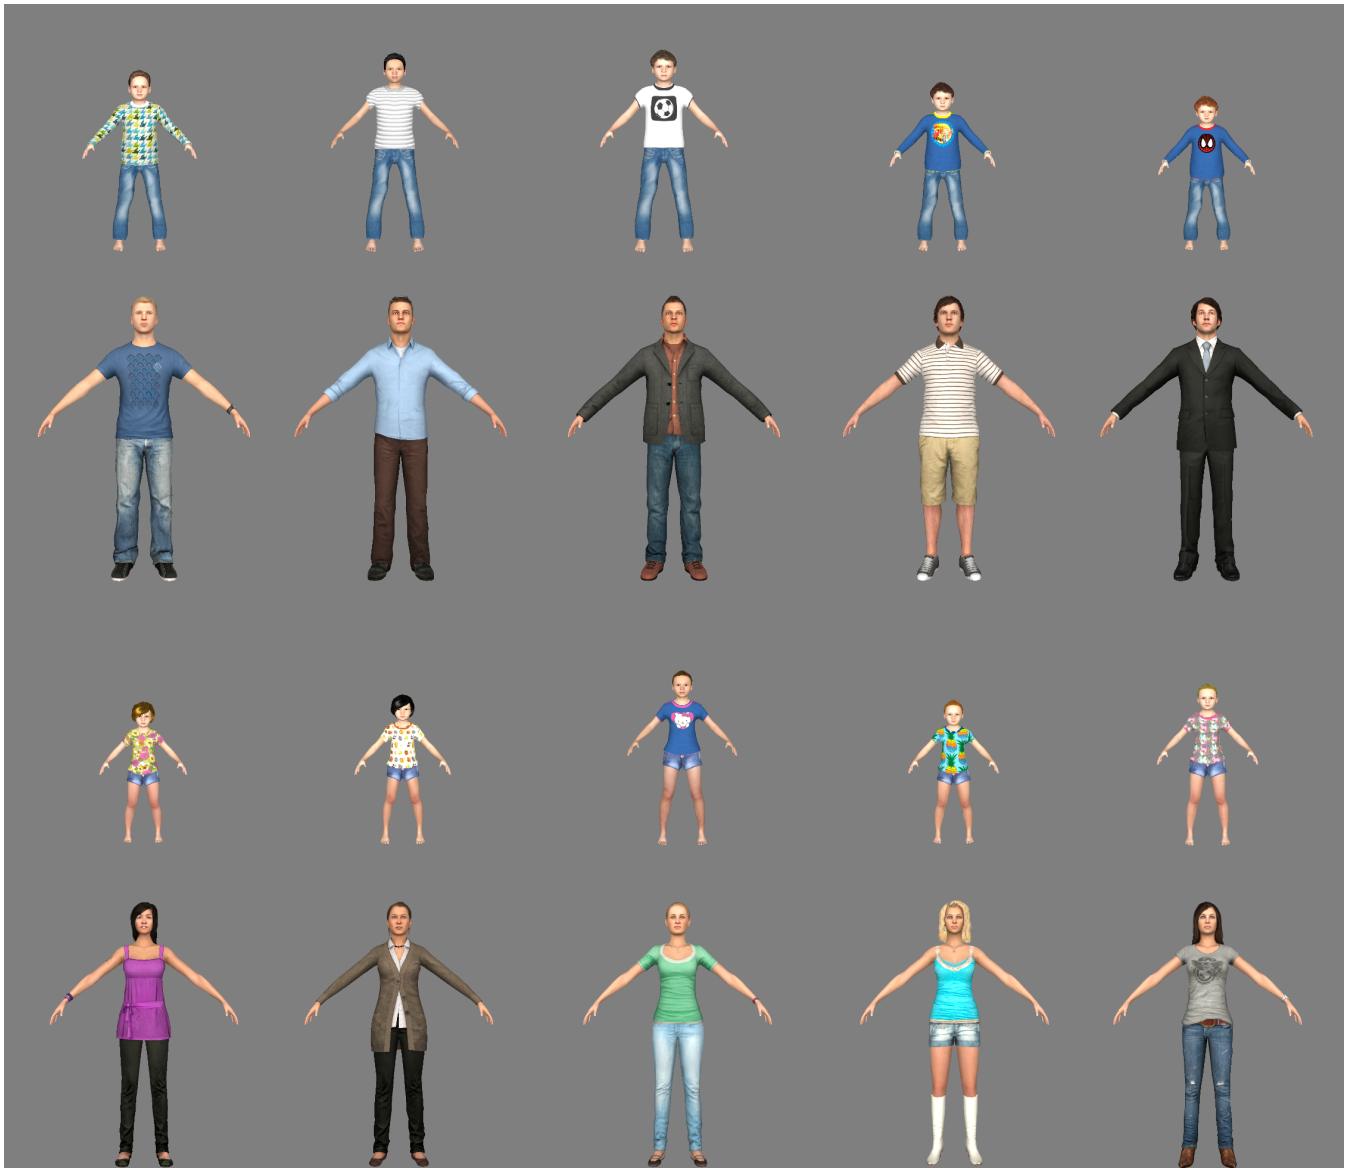

Figure S3: Overview of the virtual characters. Adult characters are from the Complete Characters HD Set (Rocketbox Studios GmbH, Hannover, Germany). Child characters were modeled by the Clinic of Psychiatry and Psychotherapy - Forensic Psychiatry, Human Medical Center Göttingen, Georg-August-University of Göttingen. All characters are fully rigged and animated.
